# Supplementary material
Source: publisher figshare collection journal article supplement (https://karger.figshare.com/ndownloader/files/8712796)
Supplement: Supplementary file 1 [file 8712796]

Supplementary Table 1: CSF biomarker indices for patients in the PCA group based on clinical diagnosis at last documented clinic visit

|  | Diagnosis at last clinic visit | |  |
| --- | --- | --- | --- |
|  | PCA | Other | *t*(10) |
| N | 8 | 4 |  |
| Aβ42 (pg/ml) | 257.42 (55.88) | 261.05 (44.33) | 0.11 |
| t-tau (pg/ml) | 331.18 (52.04) | 394.75 (100.10) | 1.48 |
| p-tau (pg/ml) | 51.95 (9.85) | 52.49 (9.90) | 0.09‡ |
| ATI | 0.41 (0.09) | 0.37 (0.06) | -0.70 |

Parentheses denote standard deviations. ‡*t*(9) due to missing data from one patient with a diagnosis of PCA at their last clinic visit.

Supplementary Table 2: Semi-quantitative imaging analyses of regional FDG PET hypometabolism in PCA patients with and without CSF biomarker data

|  | PCA Without CSF | PCA With CSF | *t*(12) |
| --- | --- | --- | --- |
| N | 8 | 6 | -- |
| *Frontal* |  |  |  |
| Right | 0.12 (0.35) | 0.17 (0.41) | -0.20 |
| Left | 0.12 (0.35) | 0.17 (0.41) | -0.20 |
| *Temporal* |  |  |  |
| Right | 0.88 (0.84) | 1.67 (1.03) | -1.59 |
| Left | 0.88 (0.84) | 1.50 (1.23) | -1.14 |
| *Parietal* |  |  |  |
| Right | 1.12 (0.84) | 1.67 (0.52) | -1.39 |
| Left | 1.25 (1.04) | 1.33 (1.03) | -0.15 |
| *Occipital* |  |  |  |
| Right | 0.25 (0.46) | 0.33 (0.52) | -0.32 |
| Left | 0.25 (0.46) | 0.67 (0.52) | -1.59 |

Parentheses denote standard deviations.
